# Supplementary material
Source: PubMed Central journal article supplement (PMC7756981)

**Supplemental Table 1: Participating Sites**

|                                      | <b>Clinical Trial<br/>(n=30)*</b> | <b>Control<br/>(n=90)</b> |
|--------------------------------------|-----------------------------------|---------------------------|
| City of Hope National Medical Center | 15                                | 12                        |
| Massachusetts General Hospital       | 2                                 | 11                        |
| Mount Sinai Hospital                 | 7                                 | 2                         |
| Ohio State University                | 5                                 | 3                         |
| Vanderbilt University                | 1                                 | 2                         |
| Columbia University                  | -                                 | 6                         |
| Mayo Clinic                          | -                                 | 20                        |
| University of Pennsylvania           | -                                 | 6                         |
| Bambino Gesu Hospital                | -                                 | 1                         |
| King Chulalongkorn Hospital          | -                                 | 1                         |
| University of Erlangen               | -                                 | 8                         |
| University of Hamburg                | -                                 | 11                        |
| University of Regensburg             | -                                 | 7                         |

\*The pre-emption trial was open at five centers: City of Hope Comprehensive Cancer Center, Massachusetts General Hospital, Mount Sinai Hospital, Ohio State University, and Vanderbilt University. The controls were obtained from the MAGIC database and biorepository.

**Supplemental Table 2: Adverse Events.**

| Type of AE                 |            | CTCAE<br>Grade 3 | CTCAE<br>Grade 4 | CTCAE<br>Grade 5 |
|----------------------------|------------|------------------|------------------|------------------|
| Cardiac Disorder           |            | 1                | 0                | 0                |
| Engraftment Syndrome       |            | 2                | 0                | 0                |
| Gastrointestinal Disorder  |            | 1                | 0                | 0                |
| Headache                   |            | 1                | 0                | 0                |
| Hypertension               |            | 1                | 0                | 0                |
| Infection                  | Bacterial  | 2                | 1                | 0                |
|                            | Fungal/PCP | 0                | 1                | 1                |
| Infusion reactions         |            | 2                | 0                | 0                |
| Pulmonary Event            |            | 2                | 2                | 2                |
| Thrombotic microangiopathy |            | 1                | 0                | 0                |
| Weakness/Fatigue           |            | 1                | 0                | 0                |

**Supplemental Table 3: Causes of Six-Month Non-Relapse Mortality**

|                        | <b>AAT (n=30)</b> | <b>Control (n=90)</b> |
|------------------------|-------------------|-----------------------|
| aGVHD                  | 1 (3.3%)          | 6 (6.7%)              |
| Infection <sup>A</sup> | 1 (3.3%)          | 3 (3.3%)              |
| Other <sup>B</sup>     | 1 (3.3%)          | 5 (5.6%)              |

<sup>A</sup>**Infection: AAT:** Pneumocystis jirovecii pneumonia/aspergillus pneumonia (1). **Control:** Disseminated candidemia (2), septic shock (1).

<sup>B</sup>**Other causes of death: AAT:** Idiopathic pneumonia syndrome (1). **Control:** Myocardial infarction (1), intracranial hemorrhage (1), veno-occlusive disease (1), multi-organ failure (1), unknown (1).

**Supplemental Figure 1: Graft-versus-host-disease (GVHD)-related outcomes.** Percent of stage 3-4 lower GI GVHD in AAT-treated patients (blue: 13%) and controls (magenta: 9%) by day one hundred.

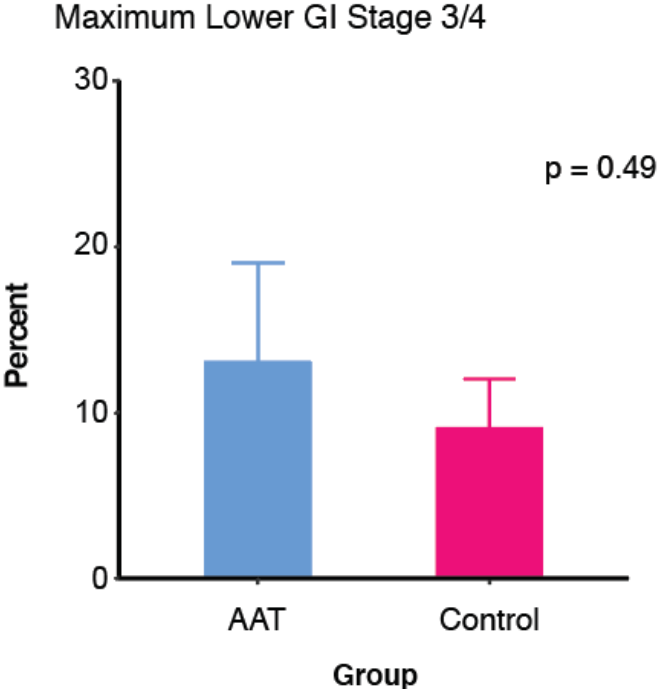

Supplement: advancesADV2020003336-suppl1.pdf [file advancesADV2020003336-suppl1.pdf]
